# Supplementary material for: Solid-state synthesis of β-NaAlO2 nanoflakes as an anode material for high-performance sodium-ion batteries
Source: Royal Society of Chemistry journal article supplement (doi:10.1039/d2qm00329e), 2022-01-01
Supplement: d2qm00329e1.pdf [file d2qm00329e1.pdf]

# Solid-state synthesis of $\beta$ -NaAlO<sub>2</sub> nanoflakes as an anode material for high-performance sodium-ion battery

Lignesh Durai<sup>1</sup>, Arthi Gopalakrishnan<sup>1†</sup> and Sushmee Badhulika<sup>1\*</sup>

<sup>1</sup>Department of Electrical Engineering, Indian Institute of Technology, Hyderabad,  
502284, India.

\*Corresponding author: E-mail: sbadh@iith.ac.in; Telephone: +040-23016467

† Equal contribution

## Supplementary Information

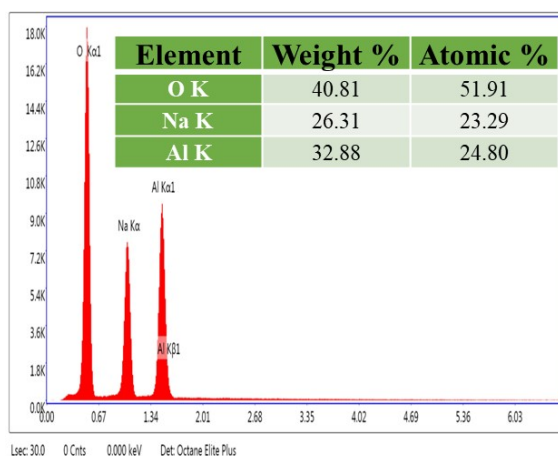

Figure S1 EDX analysis of  $\beta$ -NaAlO<sub>2</sub> nanoflakes.

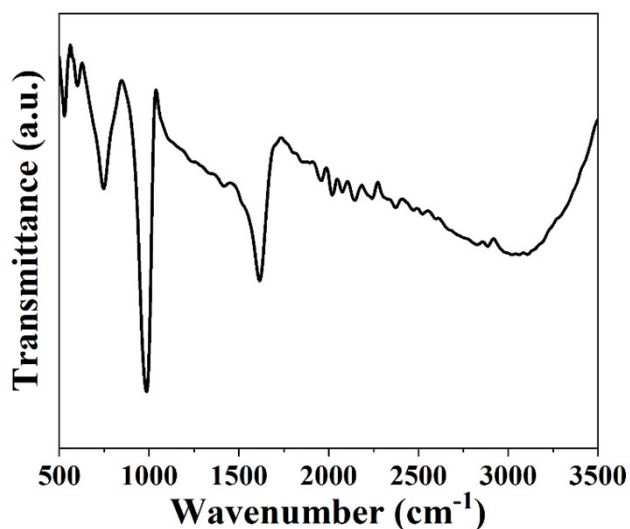

Figure S2 FTIR spectra of  $\beta$ -NaAlO<sub>2</sub> nanoflakes.

**Table S1 EIS parameters of NaAlO<sub>2</sub> anode for 1<sup>st</sup> and 100<sup>th</sup> cycle**

| Cycle No. | R <sub>1</sub> (Ω) | R <sub>2</sub> (Ω) | CPE-T (F)            | CPE-P |
|-----------|--------------------|--------------------|----------------------|-------|
| 1         | 150.06             | 110.12             | 2.745e <sup>-6</sup> | 0.231 |
| 100       | 200.21             | 102.09             | 2.621e <sup>-6</sup> | 0.275 |

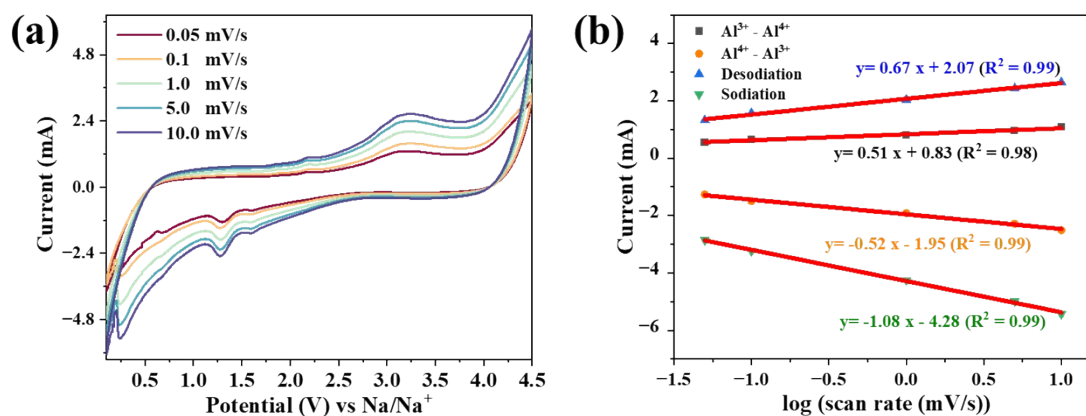

**Figure S3 (a) Cyclic voltammety curve of  $\beta$ -NaAlO<sub>2</sub> anode with different scan rates from 0.05 to 10 mV/s (b) corresponding linear calibration curve.**
